# Supplementary material
Source: PubMed Central journal article supplement (PMC8112468)
Supplement: NIHMS1683311-supplement-1.pdf [file NIHMS1683311-supplement-1.pdf]

1 **Physical Confinement during Cancer Cell Migration Triggers Therapeutic**  
2 **Resistance and Cancer Stem Cell-like Behavior**

3  
4 Qionghua Shen<sup>1</sup>, Tamara Hill<sup>1</sup>, Xue Cai<sup>2</sup>, Loan Bui<sup>3</sup>, Rami Barakat<sup>1</sup>, Emily Hills<sup>1</sup>, Turki  
5 Almugaiteeb<sup>4</sup>, Anish Babu<sup>5</sup>, Patrick H Mckernan<sup>5</sup>, Michelle Zalles<sup>6</sup>, James D Battiste<sup>5\*</sup> and  
6 Young-Tae Kim<sup>1,7\*</sup>

7 <sup>1</sup>*Neuroengineering Lab, Department of Bioengineering, University of Texas at Arlington, TX*

8 <sup>2</sup>*Department of Neurosurgery, University of Oklahoma Health Sciences Center, OK*

9 <sup>3</sup>*Department of Aerospace & Mechanical Engineering, University of Notre Dame, IN*

10 <sup>4</sup>*RPD Innovations, Riyadh, Saudi Arabia*

11 <sup>5</sup>*Department of Neurology, University of Oklahoma Health Sciences Center, OK*

12 <sup>6</sup>*Oklahoma Medical Research Foundation, OK*

13 <sup>7</sup>*Department of Urology, UT Southwestern Medical Center, TX*

14  
15 **Supplementary Information**

16  
17

18

19

20

21

22

23 **Supplementary Methods**

24 **Microchannel Device Design**

25 An engineered combination of PDMS devices were collected and applied to our study. PDMS  
26 devices were fabricated by negative photolithography combined with soft lithography. The flower  
27 device contains  $5\mu\text{m} \times 5\mu\text{m}$  microchannels. Six independent reservoirs can separate and collect  
28 cells that migrated through physical confinements (Fig. S1. A). Satellite reservoirs were  
29 individually connected to a central reservoir to guarantee the purity for each cell group but control  
30 the cells under the same testing condition. The long device contains 600 microchannels with a  
31 dimension of  $5\mu\text{m} \times 12\mu\text{m}$  (length  $\times$  width). The total length of a single microchannel is around  
32 5mm which could hold enough cells inside for protein collection (Fig. S1. B). Cells outside  
33 microchannel were considered as 2D cultured cells; cells migrating inside microchannel were  
34 considered as migrating cells and collected for Western blot analysis; cells that crept throughout  
35 the microchannel were considered to be migrated cells and used for drug studies and  
36 immunostaining (Fig. S1. C). Fig. S1. D demonstrates the protein collecting process.

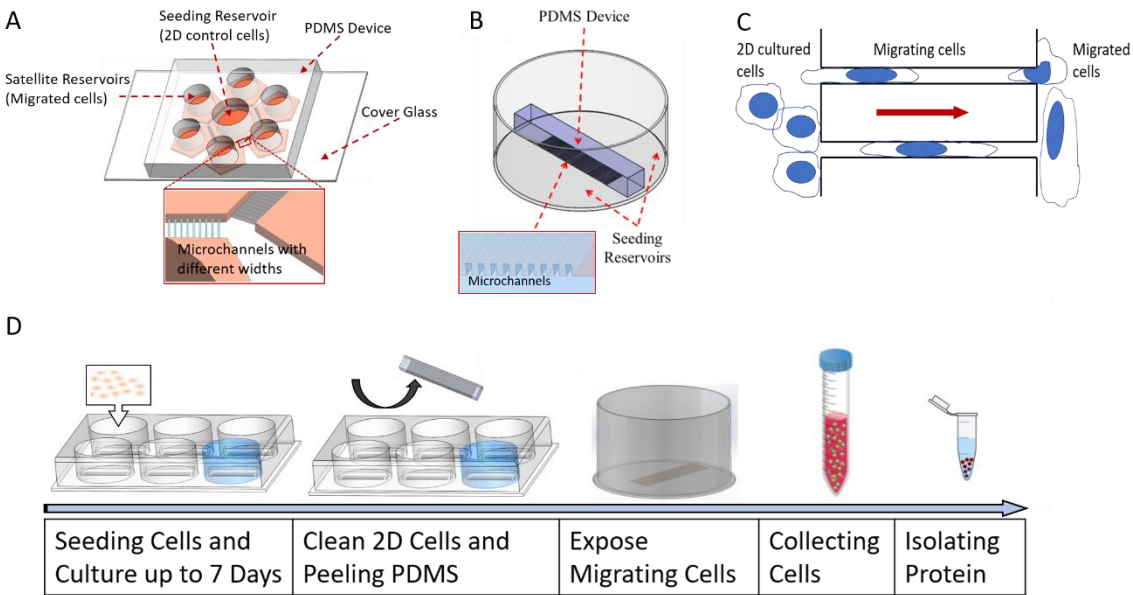

37

38

39 **Figure S1. A.** A flower device equipped with different dimensioned microchannels for drug testing  
40 and immunostaining. **B.** A long device equipped with extensive microchannels for migrating cells  
41 collection. **C.** Demonstrational image of 2D cultured cells, migrating cells and migrated cells (Red  
42 arrow indicated cell migrating direction). **D.** Procedures for migrating cell and protein collection.

43

#### 44 **ABCG2 Inhibition Test**

45 Three groups of flower devices with enough migrating G55 cells were treated with 17 $\mu$ M Dox,  
46 5 $\mu$ M Fumitremogin C (FTC), or 17 $\mu$ M Dox + 5 $\mu$ M FTC for 4 hours at 37°C. Autofluorescence  
47 images were taken for Dox, FTC and Dox + FTC groups after the addition of a fresh image  
48 medium. Samples were kept in the image medium overnight, and then were stained with the  
49 Live/Dead staining for 10 minutes at room temperature. Again, respective images were obtained.  
50 Dox autofluorescence was quantified by ImageJ and the cell viability was calculated based on the  
51 Live/Dead staining signals.

#### 52 **Quantification of Collected Migrating Cells**

53 Hoechst33342 (Invitrogen) staining of the nuclei was used to count total cell numbers. G55 cells  
54 were cultured in the long devices (n=3) for 5 days to initiate migrating cells. After 2D cells were  
55 removed by Trypsin-EDTA, devices were stained with Hoechst33342 for 1 hour and FDA-PI (for  
56 live and dead cell counting, respectively) for 20 minutes at 37°C. PDMS microchannel devices  
57 were peeled to expose the migrating cells. Hoechst33342 signals of the entire microchannel device  
58 were recorded by video. Fluorescent images for Hoechst/FDA/PI signals were taken at 3 randomly  
59 picked sites from each device under 20 x objectives (Fig. S3. B).

#### 60 **Hypoxia Culture**

61 A custom-built hypoxia chamber constructed from a polycarbonate, air-tight container. A mixture  
62 of 90% nitrogen, 5% carbon dioxide and 5% oxygen was used to purge the hypoxia chamber. Cells  
63 were cultured in hypoxic condition (< 5% oxygen) for 72 hours, and the chamber was purged once  
64 a day at 24-hour intervals.

#### 65 **Total Protein Quantification**

66 Total protein samples with equal amount (24  $\mu$ l) were loaded into two pieces of 10% SDS-page  
67 gels for all Western blot tests samples. One gel was electro-transferred to a PVDF membrane for  
68 further Western blot study. The other was stained by the Brilliant Blue to visualize total protein  
69 bands. Quantification of the intensities of the bands was performed by ImageJ. The transferred  
70 PVDF membrane was detected by GAPDH antibody (1:5,000, HRP-60004, Proteintech) to  
71 indicate the protein loading amount.

## 72 **Results and Discussion**

### 73 **FTC ABCG2 Inhibition**

74 FTC is a well-established and widely used ABCG2 inhibitor. In this study, the changes of Dox  
75 intensities were shown as overnight intensity minus 4 hour intensity. The FTC alone data were  
76 not shown in Fig. S2. A (due to the absence of auto-fluorescence of the FTC), but we did use it as  
77 a background control for signal quantification in Dox + FTC group. In the G55 2D group, nuclear  
78 Dox intensities were slightly increased in Dox (about 4 units) and Dox + FTC (about 6 units)  
79 groups. In the 5x5  $\mu$ m microchannel groups, an overnight intensity decrease was significantly  
80 bigger in Dox groups than in Dox + FTC groups, in which the intensity dropped in Dox groups  
81 was 27 units and the intensity dropped in Dox + FTC groups was 3.4 units, indicating an obvious  
82 DOX pumping out inhibition by FTC (Fig. S2. A). Our results suggest that during robust migration  
83 via tightly confined spaces the cells acquire more ABCG2 proteins in the cell membrane so that  
84 the migrating cancer cells can pump out the DOX molecules via efflux proteins which are  
85 significantly inhibited by FTC, ABCG2 inhibitor. Correspondingly, in microchannel groups,  
86 overnight cell viability in Dox + FTC treated groups was about 20% low as compared to Dox  
87 treated ones. No significant eradicating effect was observed in only FTC treated groups (Fig. S2.  
88 B).

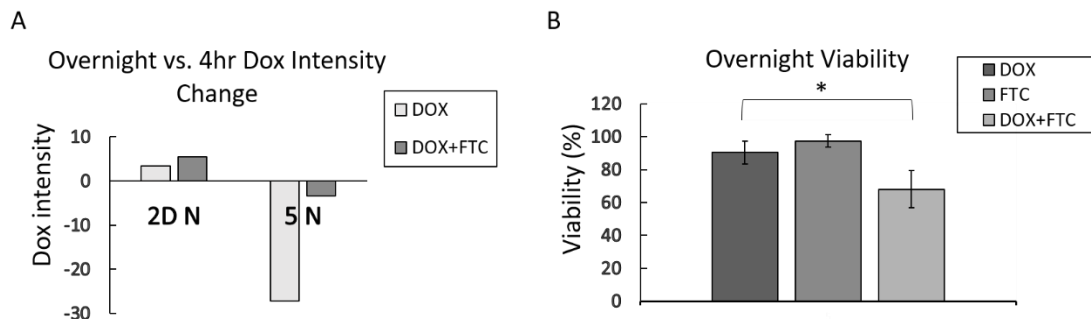

89

90 **Figure S2. A.** Dox intensity changes between at 4 hours and after overnight incubation. Data are  
 91 presented as overnight DOX intensities minus 4 hours DOX intensities (2D N: nucleus DOX  
 92 intensity in central area; and 5 N: nucleus DOX intensity in cells migrated through 5x5  $\mu\text{m}$   
 93 microchannels).  $N \geq 25$  cells/condition. **B.** Overnight viability of cells in three different conditions  
 94 (DOX, FTC, or DOX + FTC) migrated through 5x5  $\mu\text{m}$  microchannels. Cell viability was  
 95 analyzed by a Live/Dead Stain.  $N \geq 65$  cells/condition. \* $p < 0.05$  between DOX and DOX + FTC.

96

97 **Quantification of Collected Migrating Cells**

98 About  $3356 \pm 68$  migrating G55 cells were collected from each long device with our collecting  
 99 method. This equated to almost  $6 \times 10^4$  cells that were collected from 18 devices totally for protein  
 100 analysis study (Fig. S3. A, Left) with an almost 94% cell viability (Fig. S3. A, Right).  
 101 Representative fluorescent images showed consistent results of the viability (Fig. S3. B).

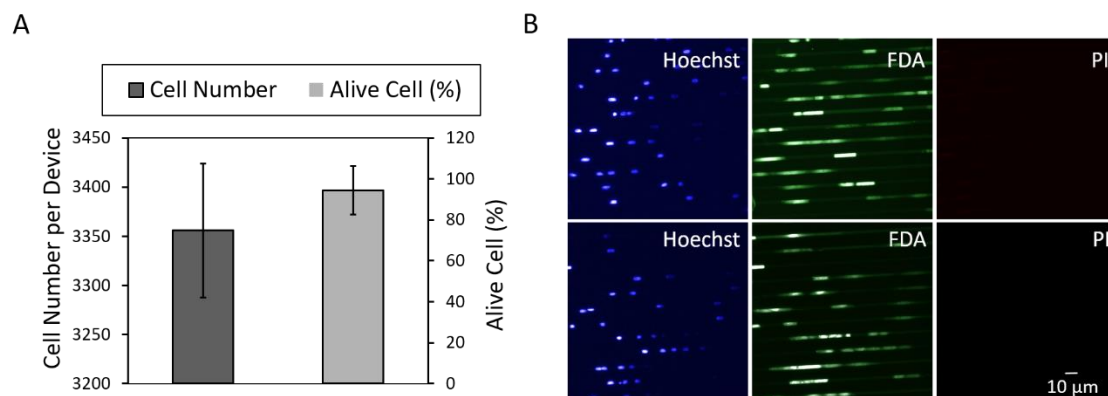

102

103 **Figure S3. A.** G55 cell number (left) and cell viability [1] from each long device after peeling.  
104 Cell viability was calculated by Hoechst33342 and PI staining. **B.** Two representative images of  
105 migrating G55 cells inside the long device (top and bottom). Blue: Hoechst33342 (total cells);  
106 Green: FDA (live cells); and Red: PI (dead cells).

107

### 108 **Comparison of Hypoxia Induced Factor expression between Hypoxia and confined-** 109 **migrating cancer cells under normoxia**

110 Two times elevated HIF-1 $\alpha$  expression was observed in the migrating G55 under normoxia as  
111 compared to in the G55 under hypoxia (Fig. S4). This result suggests that the robustly migrating  
112 cancer cells can produce significantly higher amount of the HIF-1 $\alpha$  under normoxia condition than  
113 the same cancer cells cultured under hypoxia condition.

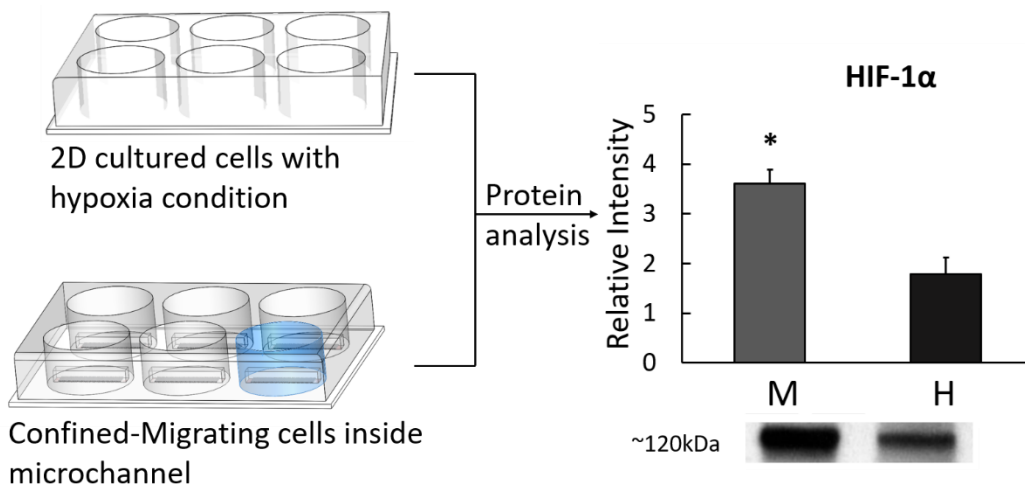

114

115 **Figure S4.** Two times elevated HIF-1 $\alpha$  expression in the confined-migrating group as compared  
116 to hypoxic chamber group. G55 western blot results are shown as Average + Std. Representative  
117 blot images of each marker are shown below their respective graphs. M = migrating G55 cells  
118 under normoxia (e.g., 20% oxygen) and H = G55 cells under hypoxia (e.g., < 5% oxygen). All  
119 results were normalized to the total proteins. \*p<0.05. All experiments were reproduced.  
120

### 121 **Total Protein Quantification**

122 For both cell lines (G55 and MDA-MB-231), although we attempted to load equal amount of  
123 proteins based on the protein concentration, the gel staining showed inequality (Fig. S5. A and C).  
124 GAPDH bands turned to be inconsistent with total gel staining. It has been pointed out that

125 GAPDH or  $\beta$ -actin (i.e., well-established Western blot loading controls) signal could be affected  
126 by hypoxia and/or migration for certain cancer types. Alternatively, that total protein stain is  
127 believed with much less variable across samples and has a greater linear range than GAPDH and  
128  $\beta$ -actin [2, 3]. Moreover, it has been reported that Coomassie staining has low cost, high reliability  
129 and compatibility [4]. Therefore, we decided to utilize the results of total proteins from gel staining  
130 for normalization and for accurate quantification.

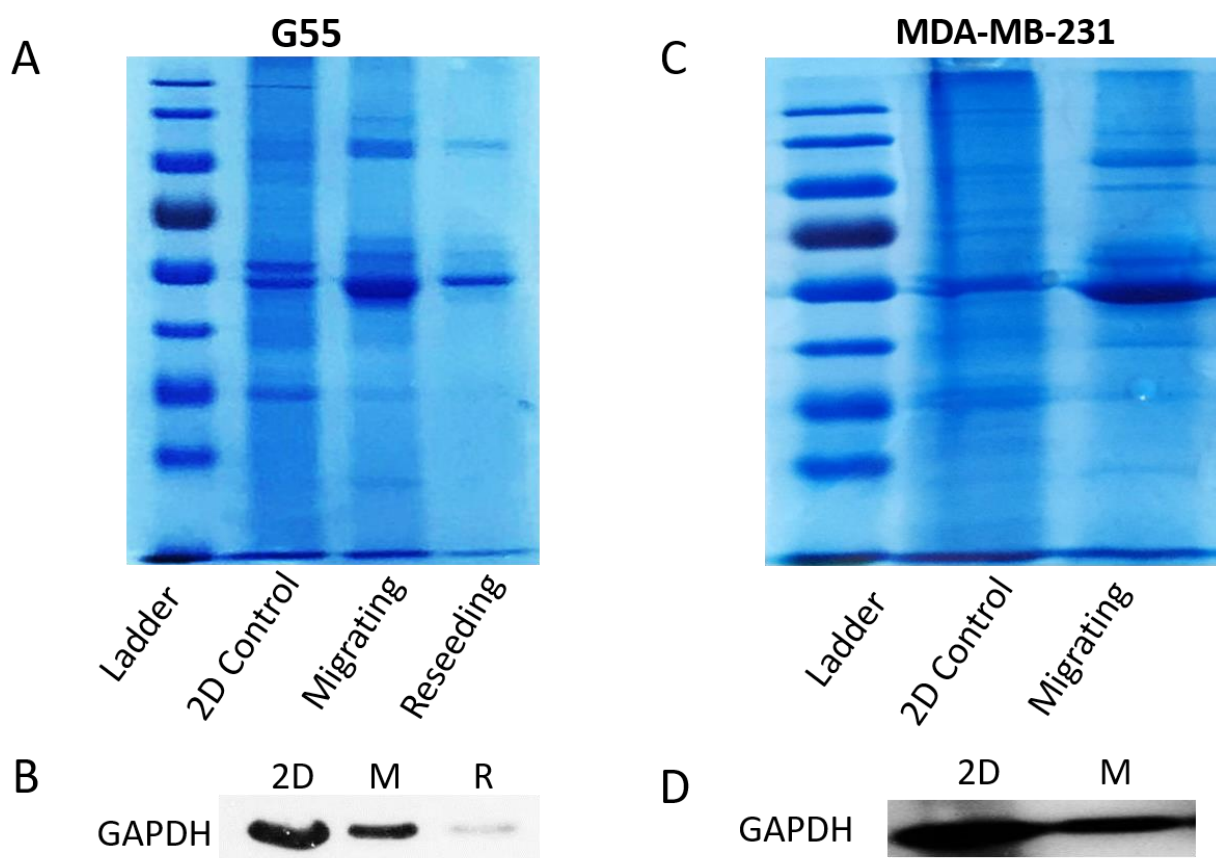

131  
132 **Figure S5.** Gel staining for total proteins and Western blot for detecting GAPDH. G55 (A) and  
133 MDA-MB-231 (C) gels with Brilliant Blue staining for total protein analysis, and corresponding  
134 Western blots of GAPDH (B and D). (2D: Non-migrating cells; M: migrating cells; and R: reseeded  
135 migrating cells).  
136

137 **Immunohistochemical Staining for CD133 in the G55 Murine Xenograft Model**

138 A high percentage of CD133 positive G55 cells were detected when tumor cells migrated to the  
139 physically confined area (e.g. parenchyma and whiter matter tracts). Higher expression of  
140 CD133 could be detected from distant metastatic G55 via white matter.

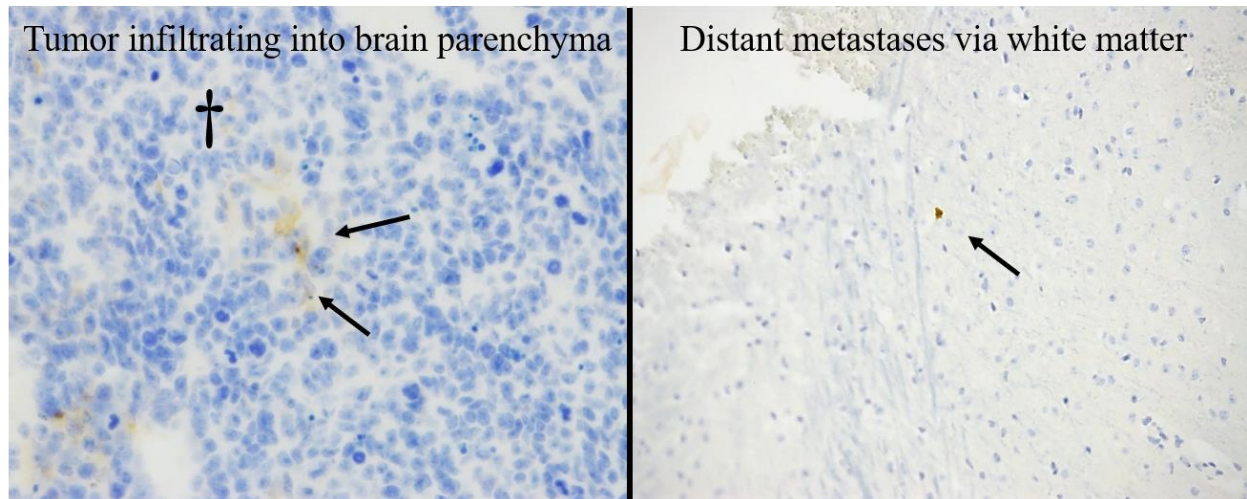

141

142 **Figure S6.** Immunohistochemical staining for CD133 in the G55 murine xenograft model with  
143 DAB secondary. PDX mouse model with G55 tumor cells implanted into the striatum of a mouse  
144 by stereotactic injection. Antibody hybridization with the anti-CD133 antibody. The left  
145 representative image showed CD133 positive G55 cells in the physically confined brain  
146 parenchyma area. The right side image demonstrated high CD133 expression for migrated G55  
147 within white matter tracts. Arrow: CD133 positive G55 cells. †: Border of G55 tumor.

148

#### 149 Reference:

150 [1] M.H. Wright, A.M. Calcagno, C.D. Salcido, M.D. Carlson, S.V. Ambudkar, L. Varticovski,  
151 Brca1 breast tumors contain distinct CD44(+)/CD24(-) and CD133(+) cells with cancer stem cell  
152 characteristics, *Breast Cancer Research*, 10 (2008).

153 [2] J.S. Thacker, D.H. Yeung, W.R. Staines, J.G. Mielke, Total protein or high-abundance  
154 protein: Which offers the best loading control for Western blotting?, *Analytical biochemistry*,  
155 496 (2016) 76-78.

156 [3] S.L. Eaton, S.L. Roche, M.L. Hurtado, K.J. Oldknow, C. Farquharson, T.H. Gillingwater,  
157 T.M. Wishart, Total protein analysis as a reliable loading control for quantitative fluorescent  
158 Western blotting, *PloS one*, 8 (2013) e72457.

159 [4] C. Welinder, L. Ekblad, Coomassie staining as loading control in Western blot analysis,  
160 *Journal of proteome research*, 10 (2011) 1416-1419.

161

162
